# Supplementary material for: Patterns of HIV Self-Disclosure in the Oncology Setting
Source: PubMed Central journal article supplement (PMC8328009; doi:10.1093/jncics/pkab058), 2021-06-04
Supplement: pkab058_supplementary_data.pdf [file pkab058_supplementary_data.pdf]

**Supplementary Table 1.** Rates of HIV self-disclosure by cancer patient features.

| Patient features                  | Total No. | Self-report yes, No. (%) |
|-----------------------------------|-----------|--------------------------|
| All cancers                       | 828       | 299 (36.1)               |
| Age, y                            |           |                          |
| ≤49                               | 380       | 130 (34.2)               |
| 50-69                             | 420       | 162 (38.6)               |
| ≥70                               | 28        | 7 (25.0)                 |
| Race/Ethnicity                    |           |                          |
| Non-Hispanic White                | 526       | 203 (38.6)               |
| Non-Hispanic Black                | 173       | 59 (34.1)                |
| Hispanic                          | 101       | 30 (29.7)                |
| Other (Asian, Mixed Race, etc.)   | 28        | 7 (25.0)                 |
| Natal Gender                      |           |                          |
| Male                              | 609       | 244 (40.1)               |
| Female                            | 219       | 55 (25.1)                |
| Education                         |           |                          |
| < High School or high school GED  | 67        | 54 (80.6)                |
| Some college or tech/trade school | 36        | 28 (77.8)                |
| College or more                   | 65        | 46 (70.8)                |
| Missing                           | 660       | 171 (25.9)               |
| Smoking                           |           |                          |
| Never                             | 35        | 1 (2.9)                  |
| Former                            | 185       | 90 (48.6)                |
| Current                           | 134       | 65 (48.5)                |
| Missing                           | 474       | 143 (30.2)               |
